# Supplementary material for: The Phosphodiesterase Type 5 Inhibitor Sildenafil Improves DNA Stability and Redox Homeostasis in Systemic Sclerosis Fibroblasts Exposed to Reactive Oxygen Species
Source: PubMed Central journal article supplement (PMC7555932; doi:10.3390/antiox9090786), 2020-08-25
Supplement: antioxidants-09-00786-s001.pdf [file antioxidants-09-00786-s001.pdf]

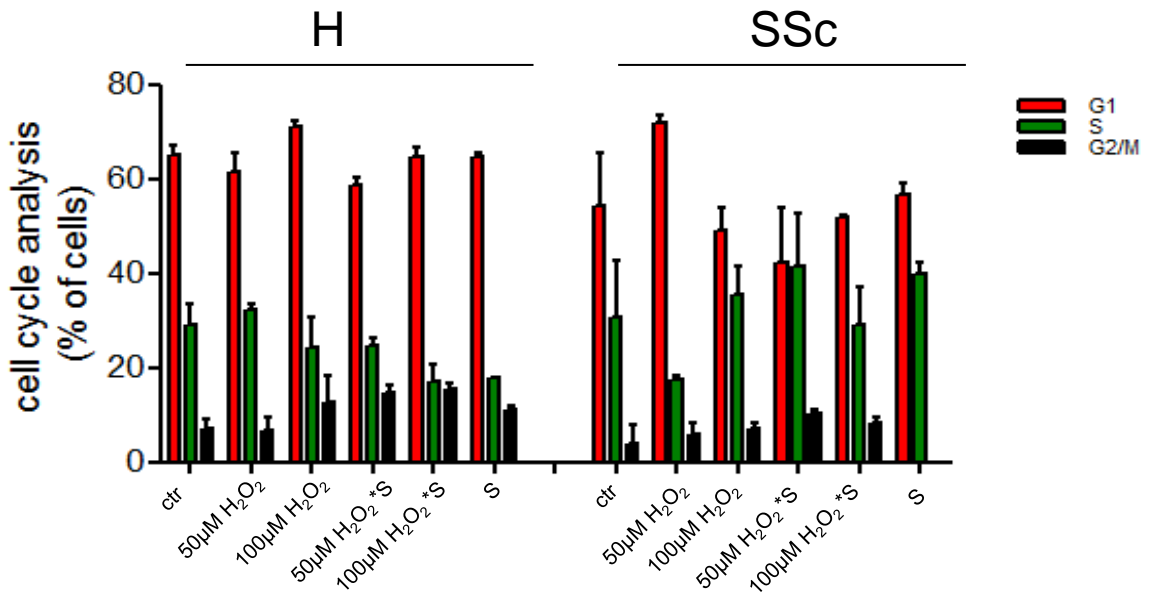

**Figure S1.** Analysis of cell cycle progression of healthy control (H) and SSc fibroblasts exposed to a pro-oxidant agent. Healthy and SSc fibroblasts were treated for 24h with 50 and 100µM H<sub>2</sub>O<sub>2</sub> in presence or in absence of sildenafil 1µM and then analyzed for cell cycle distribution in G1 (red columns), S (green columns), and G2/M phases (black columns). Data are expressed as percentage (%) ±SE of cells. S, sildenafil.

A

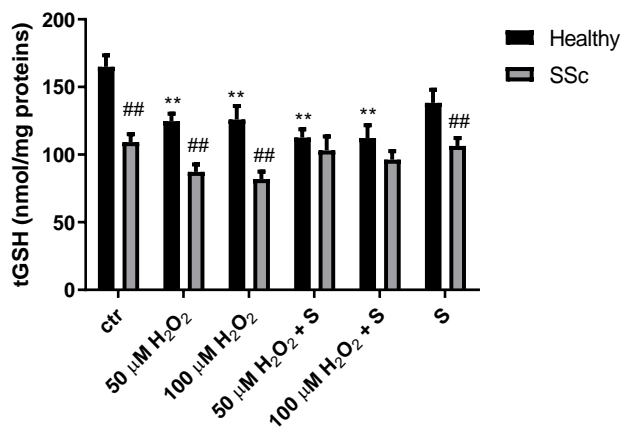

B

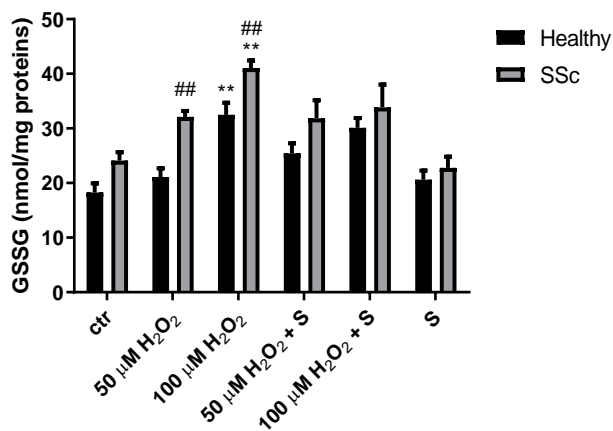

C

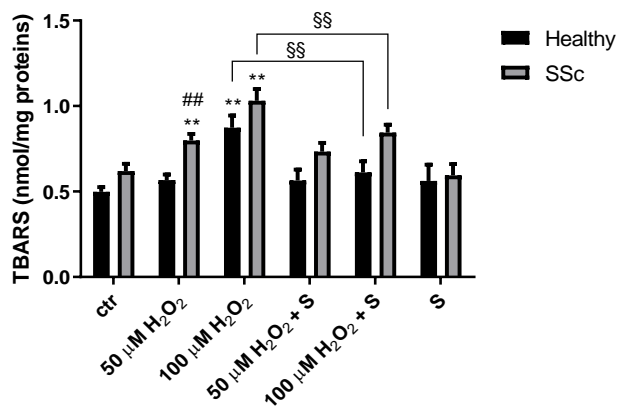

**Figure S2.** Analysis of redox status in healthy control and SSc fibroblasts treated with hydrogen peroxide. Healthy (black columns) and SSc (grey columns) fibroblasts were treated with 50 and 100  $\mu\text{M}$   $\text{H}_2\text{O}_2$  in presence or in absence of sildenafil 1  $\mu\text{M}$  and analyzed for (A) tGSH content, (B) GSSG, (C) TBARS. Data are expressed as nmol/mg of proteins, mean  $\pm$  SE. \*\* $P < 0.01$  vs. ctr; # $P < 0.01$  healthy vs. SSc; §§ $P < 0.05$   $\text{H}_2\text{O}_2$  vs.  $\text{H}_2\text{O}_2$  + S. S, sildenafil; tGSH, total glutathione; GSSG, oxidized glutathione; TBARS, thiobarbituric acid reactive substances.
